# Supplementary material for: A green emitting (Ba,Ca)ScO2F:Bi3+,K+ perovskite phosphor with high efficiency and good thermal stability for LED backlight displays
Source: Royal Society of Chemistry journal article supplement (doi:10.1039/d2ma00531j), 2022-01-01
Supplement: d2ma00531j1.pdf [file d2ma00531j1.pdf]

## Supporting Information

### A green emitting (Ba,Ca)ScO<sub>2</sub>F: Bi<sup>3+</sup>, K<sup>+</sup> perovskite phosphor with high efficiency and good thermal stability for LED backlight displays

Mingsheng Cai,<sup>ab</sup> Tianchun Lang,<sup>a</sup> Tao Han,<sup>\*a</sup> Damir Valiev,<sup>\*b</sup> Shuangqiang Fang,<sup>c</sup> Houjiang You,<sup>a</sup> Bitao Liu,<sup>a</sup> Ling Du,<sup>a</sup> ZiChao Xu<sup>a</sup> and Elena F. Polissadova<sup>b</sup>

<sup>a</sup> Chongqing Key Laboratory of Materials Surface & Interface Science, Research Institute for New Materials Technology, Chongqing University of Arts and Sciences, Chongqing, 402160, China.

<sup>b</sup> School of Advanced Manufacturing Technologies, National Research Tomsk Polytechnic University, Tomsk, 634050, Russia.

<sup>c</sup> College of Optical and Electronic Technology, China Jiliang University, Hangzhou, 310018, China

\*Email: danbaiht@126.com

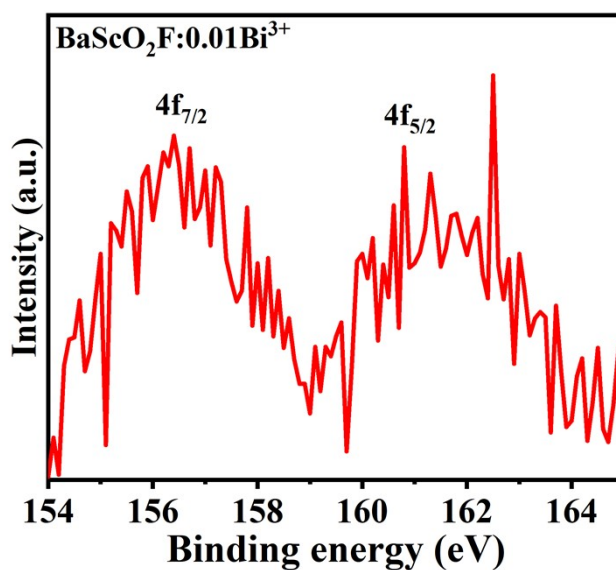

Figure S1. XPS spectrum of the BaScO<sub>2</sub>F:0.01Bi<sup>3+</sup> sample.
